# Supplementary material for: Ultrathin alumina-coated carbon nanotubes as an anode for high capacity Li-ion batteries
Source: Royal Society of Chemistry journal article supplement (doi:10.1039/c1jm11474c), 2011-01-01
Supplement: c1jm11474c.pdf [file c1jm11474c.pdf]

**Supporting information**

**Ultrathin alumina-coated carbon nanotubes as anode for high capacity Li-ion batteries**

Indranil Lahiri,<sup>a</sup> Seung-Min Oh,<sup>b</sup> Jun Y. Hwang,<sup>c</sup> Chiwon Kang,<sup>a</sup> Mansoo Choi,<sup>d</sup> Hyeongtag Jeon,<sup>d</sup> Rajarshi Banerjee,<sup>c</sup> Yang-Kook Sun<sup>b</sup> and Wonbong Choi<sup>a,b,\*</sup>

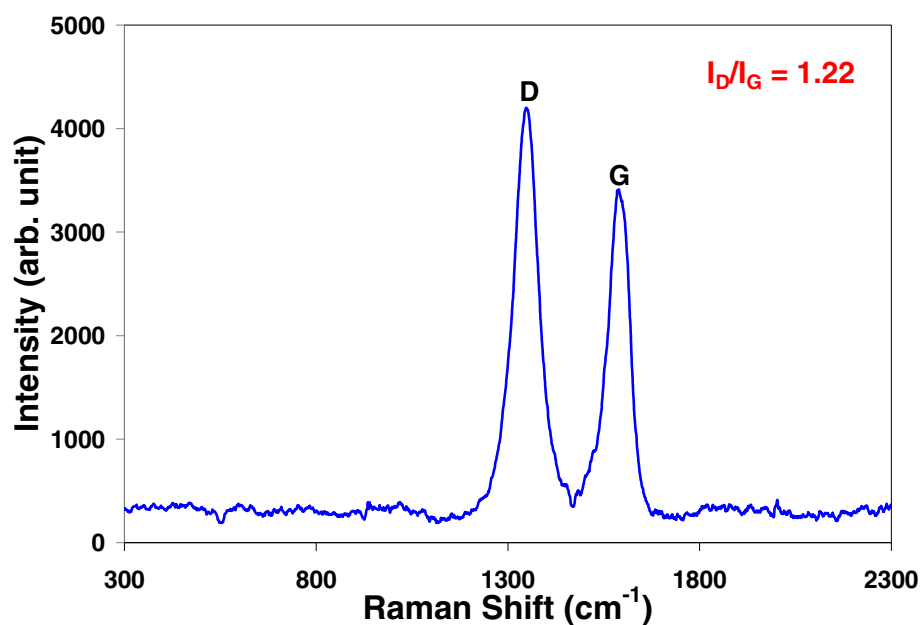

Figure S1: Raman spectra of the CNT structure grown on Cu current collector, showing high  $I_D/I_G$  ratio.

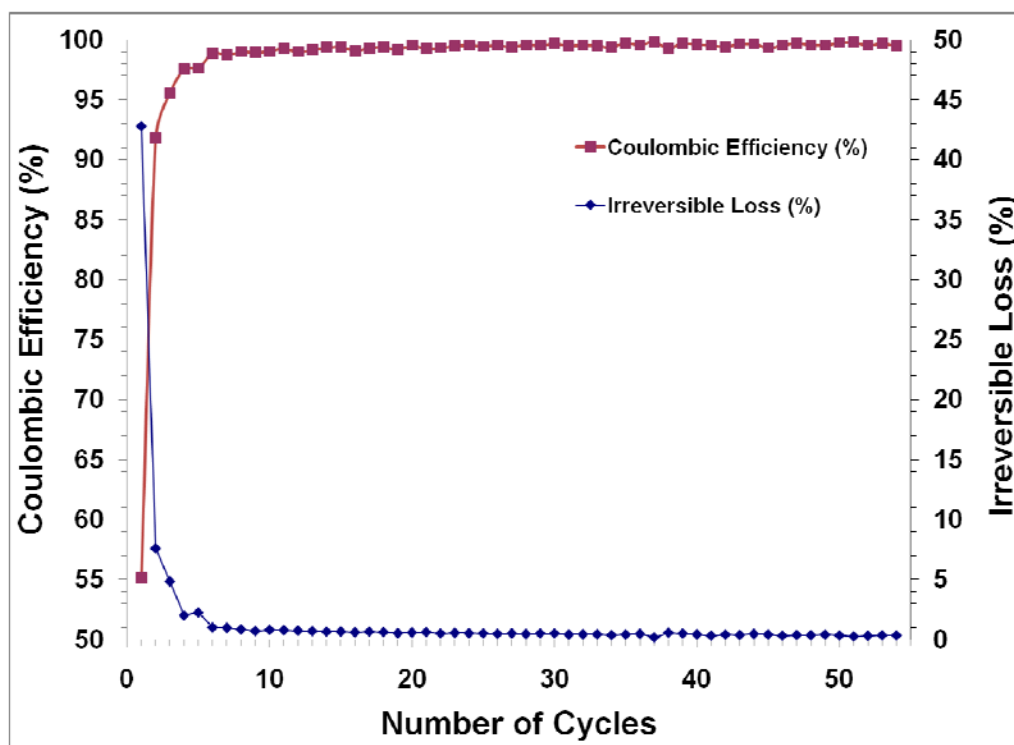

Figure S2: Coulombic efficiency and irreversible capacity loss, as a function of number of cycles. It may be observed that efficiency increases and loss decreases sharply during initial cycles. After initial 5 cycles, coulombic efficiency remains at a level of more than 99%, while irreversible capacity loss is less than 1%.
